# Supplementary material
Source: PubMed Central journal article supplement (PMC10688027)
Supplement: NIHMS1944708-supplement-7.pdf [file NIHMS1944708-supplement-7.pdf]

# Mortality rate after recurrence

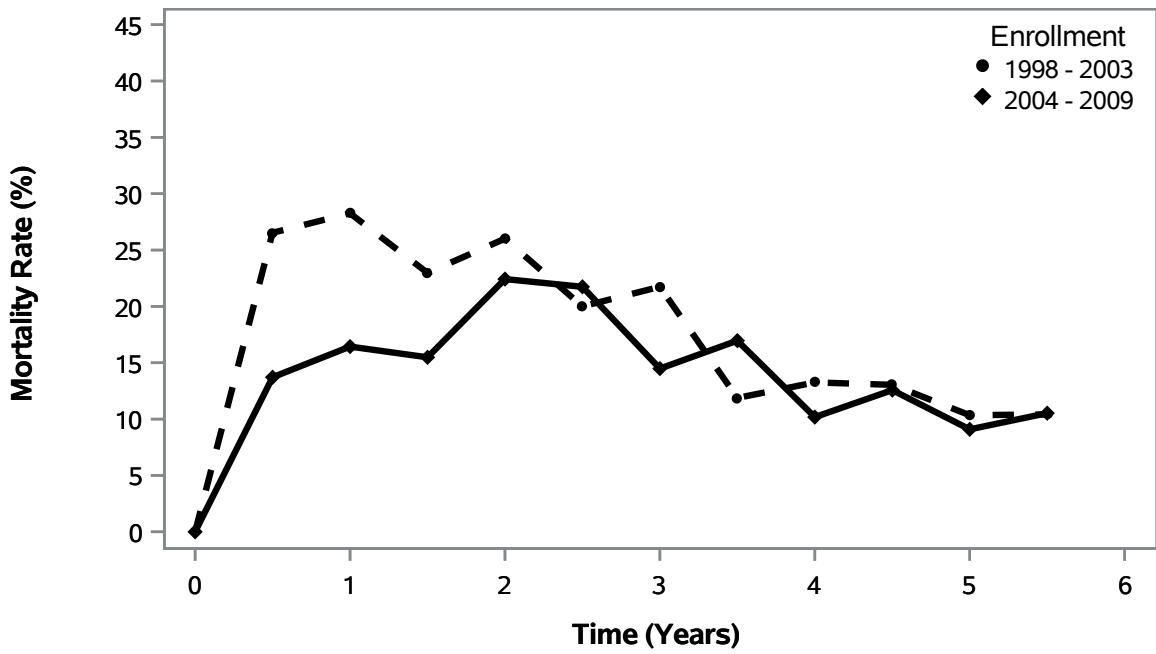

## Number at risk

|                    |      |      |     |     |     |     |     |     |     |     |     |    |
|--------------------|------|------|-----|-----|-----|-----|-----|-----|-----|-----|-----|----|
| <b>1998 - 2003</b> | 459  | 358  | 276 | 222 | 173 | 140 | 115 | 101 | 83  | 69  | 58  | 48 |
| <b>2004 - 2009</b> | 1316 | 1123 | 931 | 775 | 602 | 460 | 366 | 283 | 226 | 175 | 132 | 95 |

### Mortality rate after recurrence Patients with recurrence within 2 years

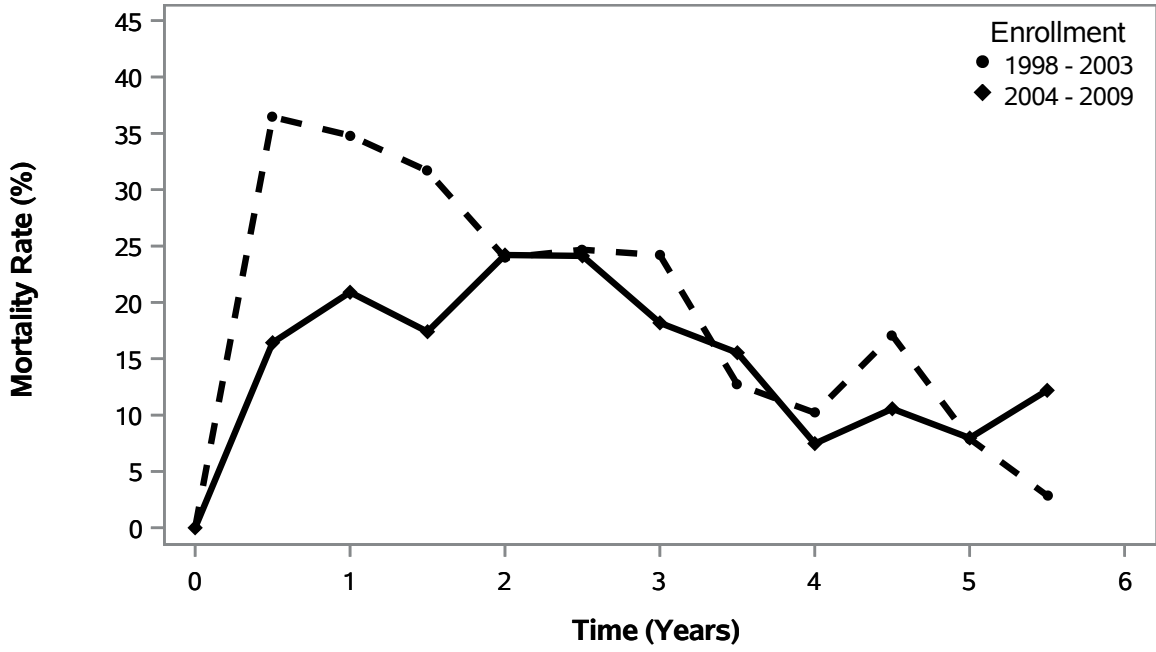

#### Number at risk

|                    |     |     |     |     |     |     |     |     |     |     |     |    |
|--------------------|-----|-----|-----|-----|-----|-----|-----|-----|-----|-----|-----|----|
| <b>1998 - 2003</b> | 294 | 214 | 158 | 120 | 96  | 77  | 62  | 55  | 49  | 41  | 38  | 35 |
| <b>2004 - 2009</b> | 896 | 761 | 622 | 523 | 409 | 315 | 253 | 206 | 174 | 142 | 113 | 82 |

**Mortality rate after recurrence  
Patients with recurrence within 2-3 years**

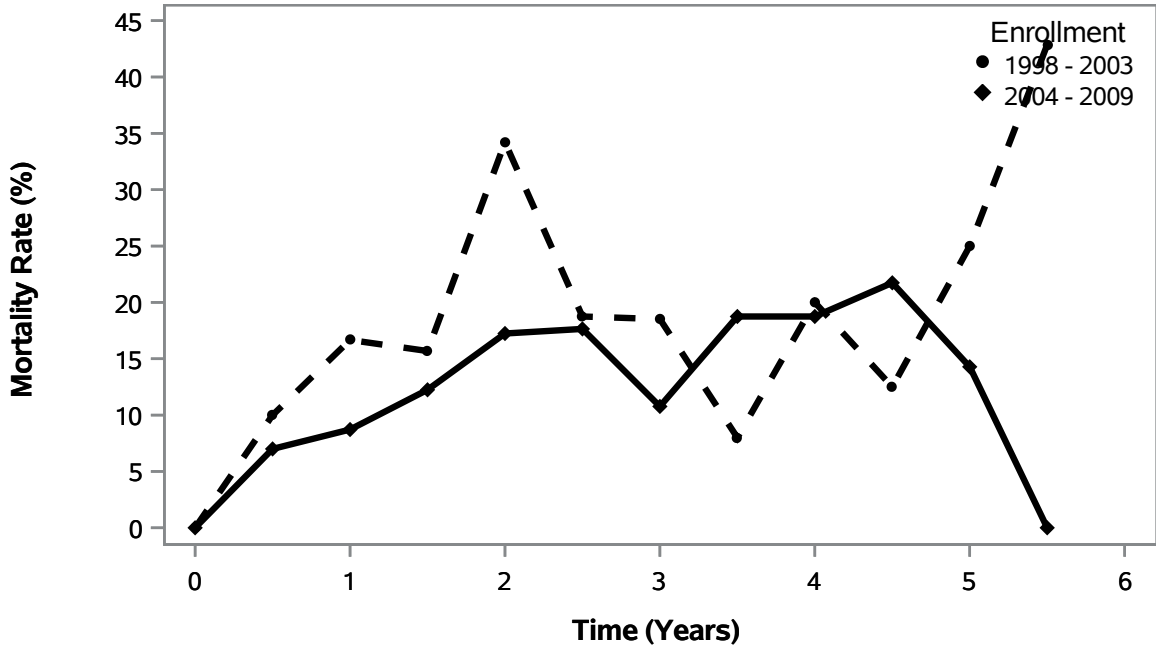

**Number at risk**

|                    |     |     |     |     |     |    |    |    |    |    |    |    |
|--------------------|-----|-----|-----|-----|-----|----|----|----|----|----|----|----|
| <b>1998 - 2003</b> | 78  | 70  | 60  | 51  | 38  | 32 | 27 | 25 | 20 | 16 | 12 | 7  |
| <b>2004 - 2009</b> | 218 | 200 | 172 | 147 | 116 | 85 | 65 | 48 | 32 | 23 | 14 | 10 |

**Mortality rate after recurrence  
Patients with recurrence at 3+ years**

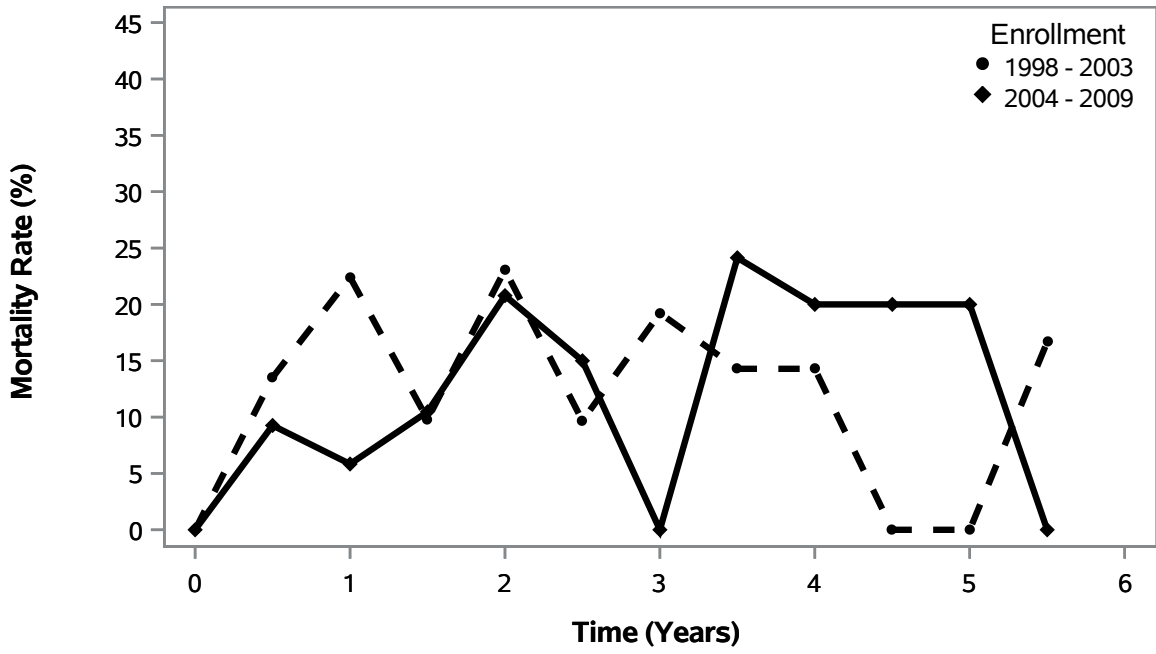

**Number at risk**

|                    |     |     |     |     |    |    |    |    |    |    |   |   |
|--------------------|-----|-----|-----|-----|----|----|----|----|----|----|---|---|
| <b>1998 - 2003</b> | 87  | 74  | 58  | 51  | 39 | 31 | 26 | 21 | 14 | 12 | 8 | 6 |
| <b>2004 - 2009</b> | 202 | 162 | 137 | 105 | 77 | 60 | 48 | 29 | 20 | 10 | 5 | 3 |
