# Supplementary material
Source: PubMed Central journal article supplement (PMC10688027)

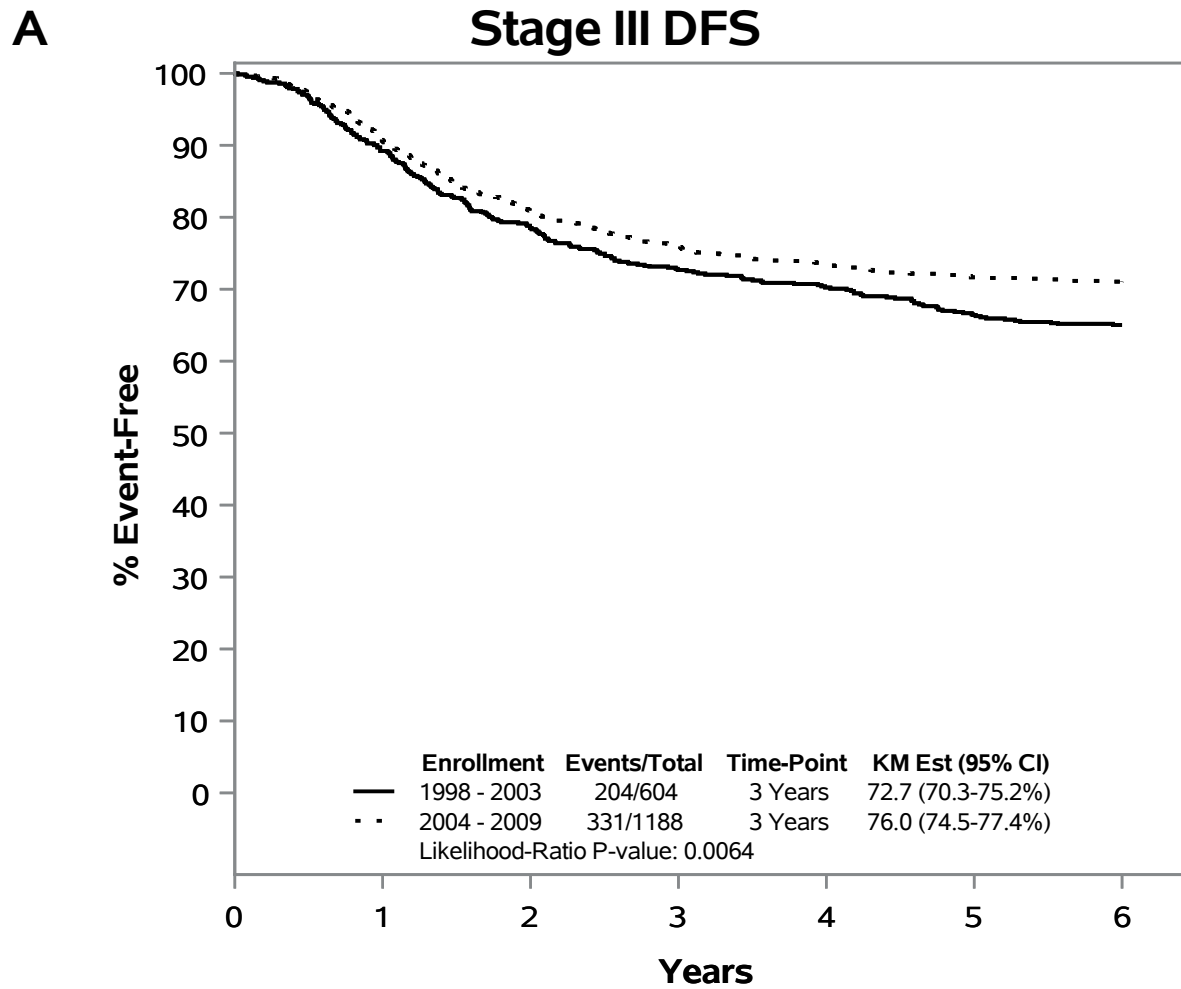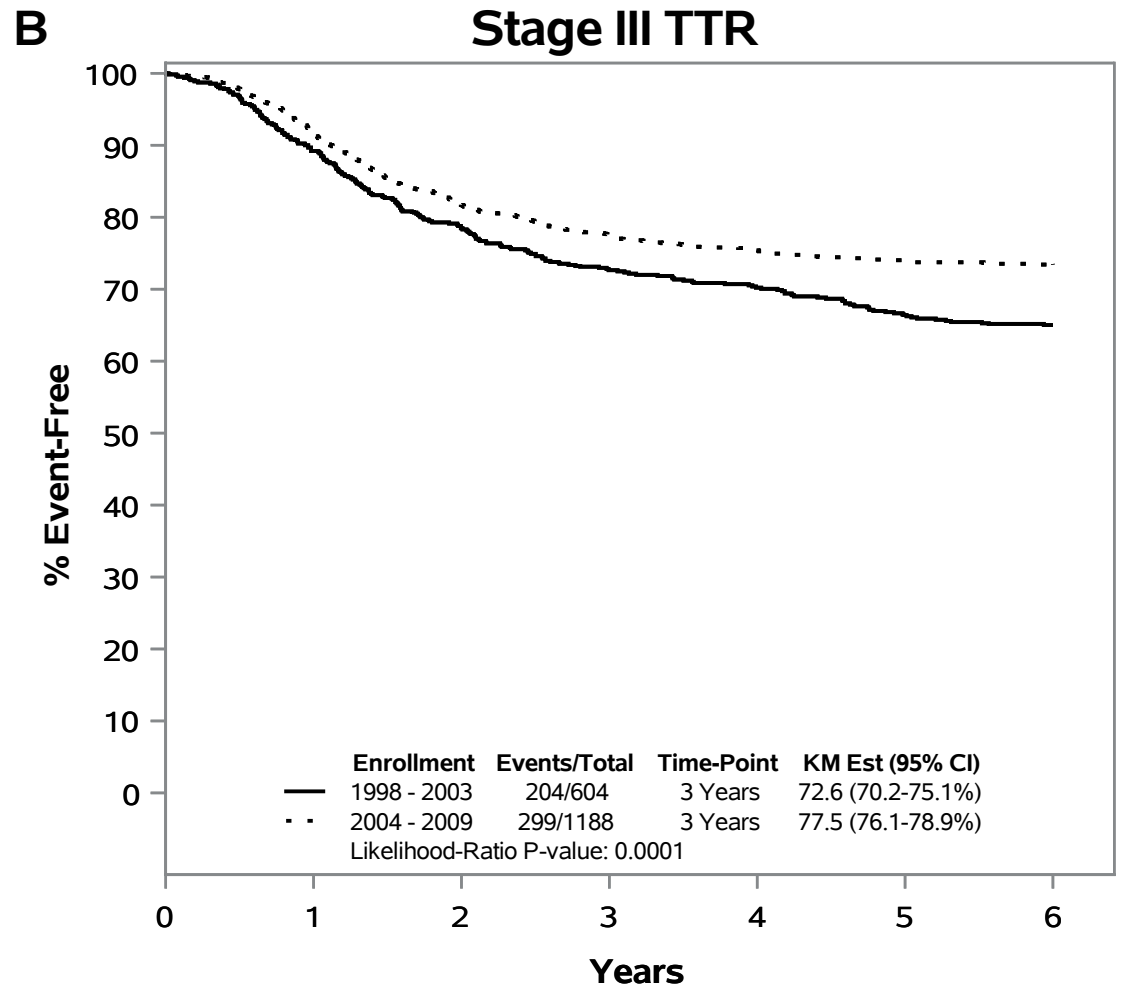

Patients-at-Risk

|             | 0    | 1    | 2   | 3   | 4   | 5   | 6   |
|-------------|------|------|-----|-----|-----|-----|-----|
| 1998 - 2003 | 604  | 536  | 471 | 434 | 416 | 392 | 372 |
| 2004 - 2009 | 1188 | 1060 | 929 | 861 | 807 | 716 | 635 |

Patients-at-Risk

|             | 0    | 1    | 2   | 3   | 4   | 5   | 6   |
|-------------|------|------|-----|-----|-----|-----|-----|
| 1998 - 2003 | 604  | 536  | 471 | 434 | 416 | 392 | 372 |
| 2004 - 2009 | 1188 | 1060 | 929 | 861 | 807 | 716 | 635 |

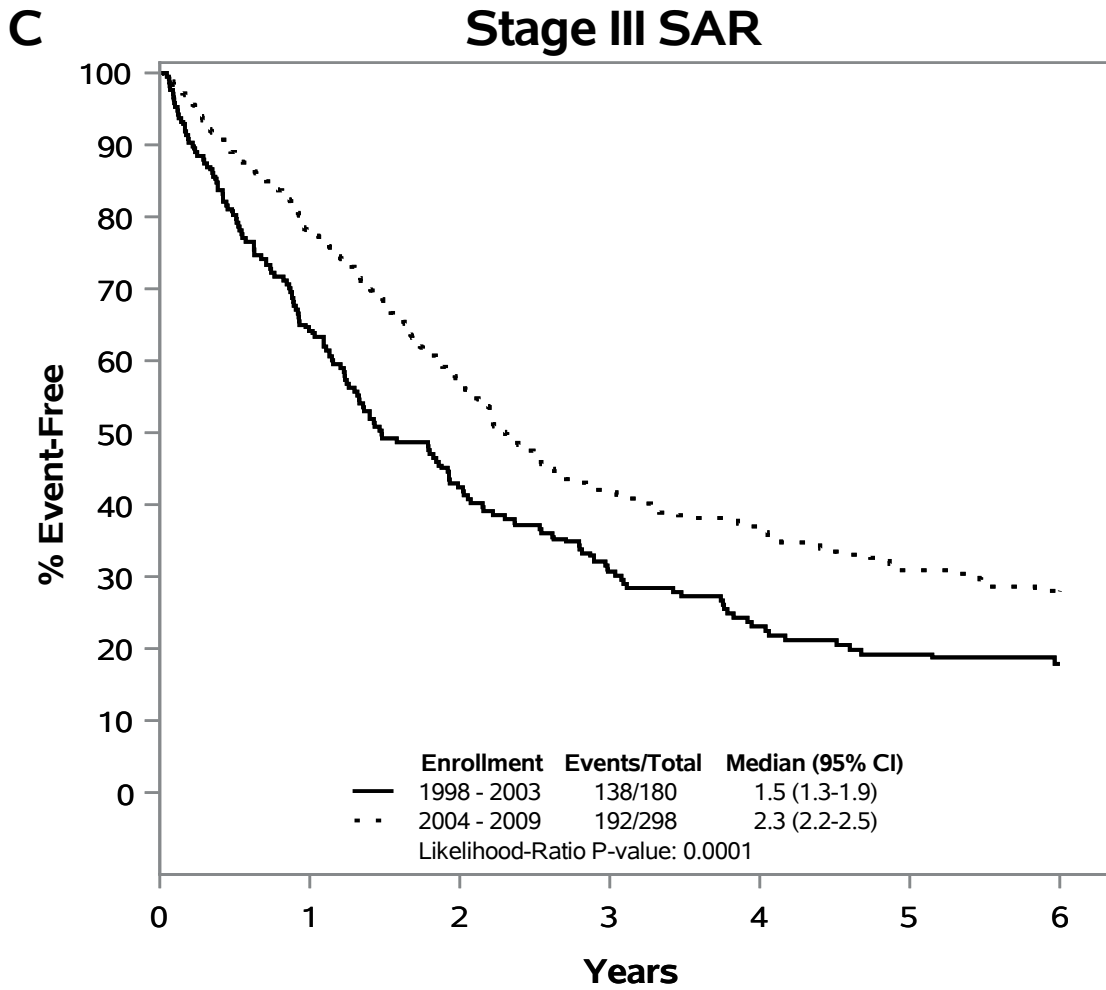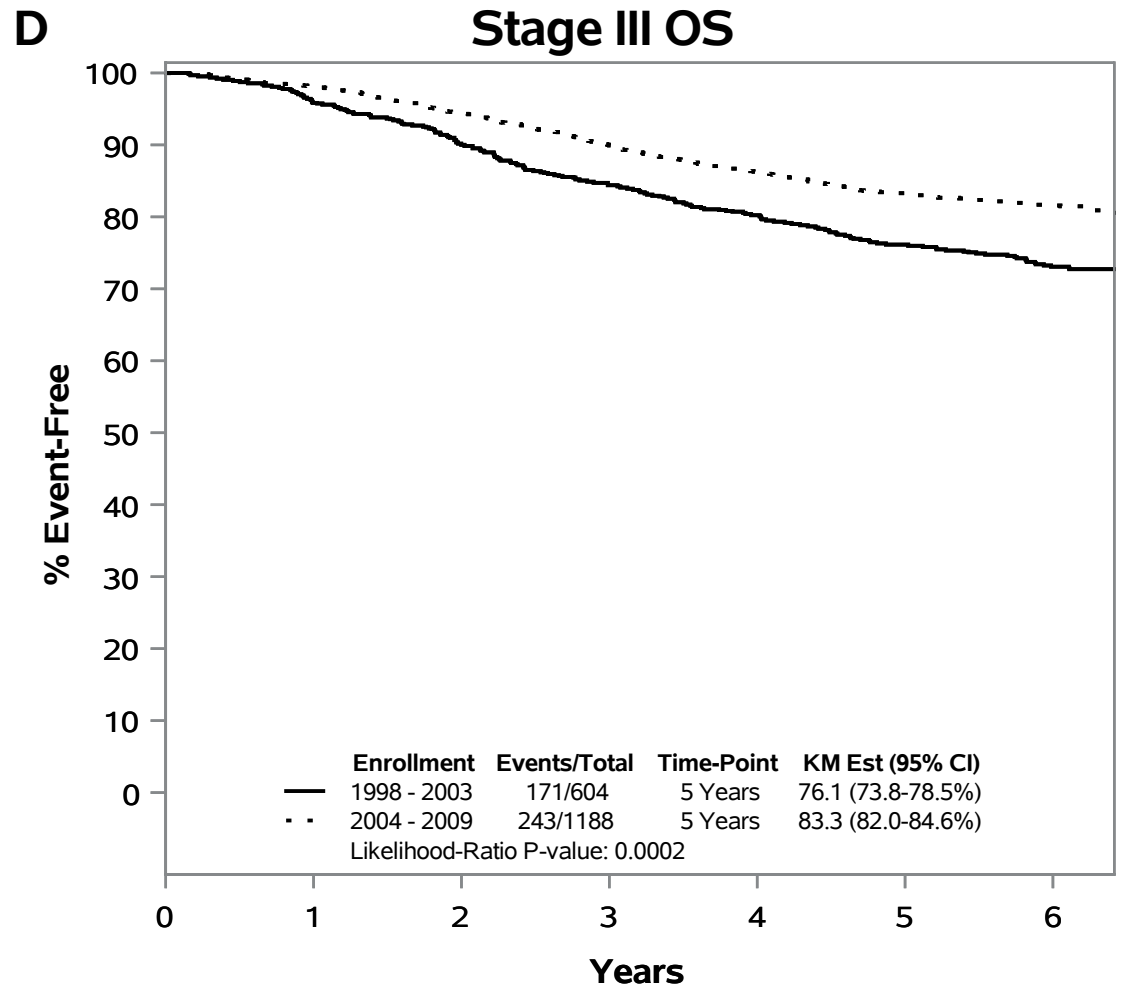

Patients-at-Risk

|             | 0   | 1   | 2   | 3   | 4  | 5  | 6  |
|-------------|-----|-----|-----|-----|----|----|----|
| 1998 - 2003 | 180 | 115 | 74  | 54  | 37 | 25 | 20 |
| 2004 - 2009 | 298 | 225 | 155 | 108 | 84 | 64 | 42 |

Patients-at-Risk

|             | 0    | 1    | 2    | 3    | 4   | 5   | 6   |
|-------------|------|------|------|------|-----|-----|-----|
| 1998 - 2003 | 604  | 573  | 537  | 503  | 474 | 448 | 416 |
| 2004 - 2009 | 1188 | 1150 | 1093 | 1017 | 938 | 824 | 726 |

Supplement: NIHMS1944708-supplement-6.pdf [file NIHMS1944708-supplement-6.pdf]
